# Core–periphery dynamics in a plant–pollinator network

Vincent Miele<sup>1</sup>, Rodrigo Ramos-Jiliberto<sup>2</sup> and Diego P. Vázquez<sup>3,4,5</sup>

<sup>1</sup> Université de Lyon, F-69000 Lyon; Université Lyon 1; CNRS, UMR5558, Laboratoire de Biométrie et Biologie Évolutive, F-69622 Villeurbanne, France. E-mail: vincent.miele@univ-lyon1.fr.

<sup>2</sup> GEMA Center for Genomics, Ecology & Environment, Faculty of Sciences, Universidad Mayor, Camino La Pirámide 5750, Huechuraba, Santiago, Chile. E-mail: rodrigo.ramos@umayor.cl.

<sup>3</sup> Argentine Institute for Dryland Research, CONICET, Mendoza, Argentina

<sup>4</sup> Freiburg Institute for Advanced Studies, University of Freiburg, Freiburg im Breisgau, Germany

<sup>5</sup> Faculty of Exact and Natural Sciences, National University of Cuyo, Mendoza, Argentina. E-mail: dvazquez@mendoza-conicet.gob.ar.

\* Corresponding author: Diego P. Vázquez, Argentine Institute for Dryland Research, CCT CONICET Mendoza, Av. Ruiz Leal s/n, 5500 Mendoza, Argentina. E-mail: dvazquez@mendoza-conicet.gob.ar.

**Article type:** Research Article

**Author’s contributions:** All authors conceived the study and wrote the manuscript. VM conducted the analyses.

## 1 **Abstract**

2 Mutualistic networks are highly dynamic, characterized by high temporal turnover of species  
3 and interactions. Yet, we have a limited understanding of how the internal structure of  
4 these networks and the roles species play in them vary through time. We used six years of  
5 observation data and a novel statistical method (dynamic stochastic block models) to assess  
6 how network structure and species' structural position within the network change across  
7 time in a quantitative plant–pollinator network from a dryland ecosystem in Argentina. Our  
8 analyses revealed a core–periphery structure persistent through seasons and years. Yet,  
9 species structural position as core or peripheral were highly dynamic: virtually all species  
10 that were at the core in some seasons were also peripheral in other seasons, while many  
11 other species remained always peripheral. Our results illuminate our understanding of the  
12 dynamics of ecological networks and have important implications for ecosystem management  
13 and conservation.

14 **Keywords:** core–periphery structure, stochastic block model, mutualistic networks, plant–  
15 pollinator interactions, species role, temporal dynamics

## 16 Introduction

17 Studies of plant–animal mutualisms have historically focused on the interactions between  
18 one or a few plant species and their animal mutualists (1; 2). This approach guided decades  
19 of research, illuminating our understanding of the natural history, ecology and evolution of  
20 plant–animal mutualisms, but at the same time limiting our understanding of how interac-  
21 tions operate in their broader community context (3). More recently, the use of a network  
22 approach to study of plant–animal mutualistic interactions in their community context has  
23 offered new insights on the relative specialization and reciprocal dependence of these in-  
24 teractions and, ultimately, the ecological and evolutionary processes that depend on them  
25 (4; 3; 5; 6). The study of mutualistic networks has revealed several pervasive properties,  
26 including nestedness (7), modularity (8), and asymmetry in both specialization (9) and inter-  
27 action strength (10), all of which are believed to have important ecological and evolutionary  
28 implications (11; 12; 6; 13).

29 Mutualistic networks are also characterized by high temporal variability, with species and  
30 interactions switching on and off through time. In other words, these networks exhibit high  
31 temporal turnover of species and interactions (14; 15; 16), in spite of an apparent stability in  
32 some aggregate network attributes such as connectance and nestedness (14; 17). Past studies  
33 have shown that the most persistent interactions are those located at the network core (the  
34 most densely connected region of the network), which usually involves abundant, frequently  
35 interacting species, and many occasional peripheral species (16; 18). What we still don't  
36 know is the extent to which the structural position of individual species as core or peripheral  
37 varies through time. In other words, is there a persistent set of core species that form the  
38 backbone of the network over seasons and years? Or is the core itself also highly dynamic,  
39 with species switching between core and peripheral positions?

40 Answering the above questions is essential to improve our understanding of how different  
41 species contribute to community stability and to guide management and conservation efforts.  
42 For example, the existence of a stable set of species at the network core could represent a

43 reasonable target for biodiversity conservation—a small, manageable set of keystone species  
44 on which to focus conservation efforts (19; 20; 21; 22; 23). Conversely, a highly dynamic  
45 network core would make that target more elusive, with a larger, variable set of potentially  
46 keystone species.

47 Here we evaluate how the structure of a plant–pollinator network and the structural po-  
48 sition of species in the network change across time. We focus on a previously published  
49 bipartite, weighted (non-binary) plant–pollinator network spanning six years in a dryland  
50 ecosystem in Villavicencio Nature Reserve, Argentina (16). Our network representation fo-  
51 cuses on the relative ecological effects between pairs of interacting species (usually referred  
52 to as *dependences*, 10; 24). Using a recent statistical framework (dynamic stochastic block  
53 models, hereafter dynSBM) (25), we quantify the temporal switching of the structural posi-  
54 tion of plants and pollinators. This analysis allows us to provide a comprehensive picture of  
55 the temporal dynamics of the internal structure of this mutualistic network.

## 56 **Material and methods**

### 57 **Study site and data collection**

58 We used a dataset describing a plant–pollinator network from pollinator visits to flowers  
59 in a dryland ecosystem. Data were collected weekly during three months during the flow-  
60 ering season (Austral spring and early summer, September–December) between 2006 and  
61 2011 from the Monte Desert ecoregion at Villavicencio Nature Reserve, Mendoza, Argentina  
62 ( $32^{\circ} 32' S$ ,  $68^{\circ} 57' W$ , 1270 m above sea level). The data include 59 plant species, 196  
63 flower visitor species, and 28015 interaction events (flower visits) involving 1050 different  
64 pairs of interacting species. Plant abundance was estimated based on the density of flowers  
65 of each plant species, as flowers are the relevant plant structure for this interaction type.  
66 Flower abundance was estimated during the flowering season of all study years using fixed  
67 quadrats/transects. Several rare plant species were absent from our fixed quadrats and

68 transects but present elsewhere in our study site; for those species we assigned an abundance  
69 of one flower, the minimum we could have detected with our sampling method. A full account  
70 of the methodology can be found in Ref. (16; 22).

## 71 **Building plant–pollinator dependence networks**

72 We aggregated the data by pooling the number of visits of any pollinator to any plant in 3  
73 subseasons by year (before November 1st, after November 30th and in between). Such level  
74 of aggregation allowed us to consider seasonal dynamics at a temporal grain that was not  
75 too fine nor too coarse to allow a reasonable representation of network structure.

76 For any subseason, we built a plant-pollinator *dependence network*  $D$ , a directed weighted  
77 network representing the relative dependences among plant and pollinator species (10; 24).  
78 From the number of visits in a time interval  $X_{ij}$  between any pair of species of plant and  
79 pollinator  $(i, j)$ , we considered two directed and weighted edges in  $D$ : the dependence of plant  
80  $i$  on pollinator  $j$ ,  $D_{ij} = X_{ij} / \sum_j X_{ij}$ , representing the number of visits of pollinator  $j$  to plant  
81  $i$  divided by the total number of visits received by plant  $i$ ; and the reciprocal dependence of  
82 pollinator  $j$  on plant  $i$ ,  $D_{ji} = X_{ij} / \sum_i X_{ij}$ , representing the number of visits of pollinator  $j$   
83 to plant  $i$  divided by the total number of visits done by  $j$ . Applying this approach to our  
84 raw data, we obtained a time series of 18 dependence networks. To represent graphically  
85 these networks, we showed the successive bi-adjacency matrices (plants in rows, pollinators  
86 in columns) using a color code accounting for the two values  $D_{ij}$  and  $D_{ji}$  for any species pair  
87  $(i, j)$  (see an example in Figure 1).

## 88 **Inferring topology and species’ structural position in the dynamic** 89 **network**

90 Recently in Ecology (26; 27; 28; 29; 30), some authors have suggested the use of statistical  
91 methods which jointly infer structural properties and species positions. Originally developed  
92 in the field of social sciences (31), *Stochastic Block Models* (SBM; 32; 33)—also called *Group*

93 *Models* in the seminal work by Allesina and Pascual (27)—aim at grouping nodes (species  
94 in our case) that are statistically equivalent, “acting” similarly in the network, *i.e.*, having  
95 an equivalent “structural position”. These methods follow a particular paradigm: instead of  
96 searching for a particular pattern, we infer one from the data. SBM can handle weighted  
97 networks with appropriate statistical distributions; we chose them for their ability to decipher  
98 core–periphery structure in network data (as mentioned in Figure 1 in 34), as they can infer  
99 groups of core species and peripheral species.

100 Furthermore, studying network dynamics requires a method that can handle and model  
101 the whole time series of network snapshots (*i.e.*, in a *dynamic network*). Recently, Matias  
102 and Miele (25) proposed an extension of SBM for dynamic networks called dynSBM. Under  
103 this approach, the structural position of any species can vary over time. In other words,  
104 each structural group (for instance a core group) is inferred using the complete series, but  
105 the group membership can vary from any time step to another. Here we rely on a modified  
106 version of this approach dedicated to bipartite networks (see Supplementary information)  
107 implemented in the R package `dynsbm` available on CRAN at [https://cran.r-project.](https://cran.r-project.org/web/packages/dynsbm/)  
108 [org/web/packages/dynsbm/](https://cran.r-project.org/web/packages/dynsbm/). Importantly, the number of groups is constant and selected  
109 with an appropriate heuristics (Supplementary Figure S1).

## 110 Results

111 **A persistent core-periphery structure** By applying the dynSBM algorithm, we found  
112 that the Villavicencio plant–pollinator network is organized as a core–periphery structure.  
113 This network structure comprises two components, each one composed of a group of plants  
114 and a group of pollinators. The first component consists of one group of plant species and  
115 one group of pollinator species forming a persistent cohesive module (the network *core*),  
116 while the second component was composed of a group of plants and a group of pollinators  
117 gravitating in the network *periphery* (Supplementary Fig. S1). The proportions of species

118 in these groups varied only modestly through time ( $\chi^2 = 64.92$ , d.f. = 51,  $P = 0.09$ ) in spite  
119 of being unconstrained in dynSBM (Fig. 2); in contrast, these proportions varied widely in  
120 randomized networks (Supplementary Figure S3).

121 Core and peripheral species differ markedly in terms of their linkage patterns. The core  
122 group of plants (top rows of matrices in Fig. 2) consisted of species visited by many pollinator  
123 species, especially species in the core group of pollinators (left columns of matrices in Fig. 2),  
124 which visited many plant species. Species in these core groups of plants and pollinators are  
125 weakly dependent on their interaction partners (Supplementary Fig. S2). Thus, the network  
126 core can be envisioned as a densely connected “module” of generalized plant and pollinator  
127 species with low mutual dependence among them (Fig. 3). In contrast, the peripheral  
128 group of plants (bottom rows of matrices in Fig. 2) includes species visited mostly by core  
129 pollinator species; dependence is highly asymmetric for these plants, in the sense that they  
130 are highly dependent on pollinators who are not reciprocally dependent on their host plants  
131 (Supplementary Fig. S2). Likewise, the peripheral group of pollinators (right columns of  
132 matrices in Fig. 2) includes species interacting mostly with core plants, also asymmetrically  
133 dependent on plants that are not reciprocally dependent on them (Fig. 3). In addition,  
134 there are only a few interactions between peripheral plant and pollinator species, with no  
135 particular trend regarding their reciprocal dependence (Supplementary Fig. S2).

136 **The core–periphery structure is robust to changes in species diversity and compo-**  
137 **sition** The core–periphery structure persisted despite two sources of variation: the diversity  
138 of species and their identities. First, the diversity of plant and pollinator species varied over  
139 time, so that each year the number of plant species in bloom tended to decrease from the  
140 first to the third subseason, whereas the number of pollinator species tended to peak  
141 in the second subseason (Supplementary Fig. S4); yet, the proportion of core plant species  
142 increased from the first to the third subseason each year (Fig. 2; plant core group in the  
143 upper part of each matrix). Thus, the size of the plant core group was independent of plant  
144 diversity. Second, the identity of interacting species and their activity (as measured by the

145 total number of floral visits received by a plant or performed by a pollinator) changed greatly  
146 from one time step to another, resulting in substantial temporal variation in the species as-  
147 sembly (Supplementary Fig. S5). Yet, despite these variations in the interactions at the  
148 species level, the core–periphery structure persisted over time.

149 **Species in the core are also sometimes peripheral** Species structural positions were  
150 highly dynamic. Almost all species that were in the core in some seasons were also peripheral  
151 in other seasons (except one plant and one pollinator species); however, a large proportion  
152 of peripheral species never became part of the core (52% for plants, 72% for pollinators; see  
153 Fig. 4). Thus, only a subset of species were ever part of the core, and virtually no species  
154 occupied that position persistently through time.

155 There was a positive correlation between overall species presence (i.e. the number of  
156 subseasons a species was recorded interacting) and their presence in the core: the more  
157 frequently a plant or a pollinator species was present in the community, the more frequently  
158 it was found in the core (see Fig. 4 and Supplementary Fig. S6). Furthermore, for plant  
159 species for which we have independent abundance data, we observed that their abundance  
160 tended to be higher when they are in the core than when they are peripheral (Supplementary  
161 Fig. S7).

## 162 Discussion

163 Our analysis using dynamic stochastic block models allowed us to delve into the topological  
164 dynamics of a plant–pollinator network. In a nutshell, we found that this network is charac-  
165 terized by a core–periphery structure persistent through seasons and years, while exhibiting  
166 high temporal switching of species structural positions. These results offer a unique temporal  
167 perspective into the dynamics of mutualistic networks.

168 The core–periphery structure was maintained in spite of high temporal variation in species  
169 richness and composition. The distribution of dependences also persisted over time, with



170 highly asymmetric dependences for most peripheral species, which tended to interact with  
171 core species; in turn, interactions among core species tended to be more symmetric, albeit  
172 with weaker dependences. Yet, the network position occupied by plant and pollinator species  
173 was highly dynamic: virtually all species that played a core role in some seasons were also  
174 peripheral in other seasons, while many other species remained always peripheral. Further-  
175 more, presence in the network core was related to overall species presence: species present  
176 in many subseasons tended to be more consistently at the core than species present only in  
177 few subseasons. Previous studies had documented that nestedness (which can be viewed as  
178 a particular type of core–periphery structure, 35) characterizes many plant–animal mutual-  
179 istic networks (7) and that such structure is persistent over the years (14; 16) in spite of  
180 an enormous temporal variation in the occurrence of interactions (14; 15; 16). Our findings  
181 extend those results, indicating that species structural position in the network is also highly  
182 dynamic. Thus, while the core–periphery structure persists over time, the taxonomic identity  
183 of the core changes drastically through seasons and years, and no species can be identified  
184 as playing permanently a core role.

185 The latter finding has far-reaching practical implications, as the idea of focusing man-  
186 agement and conservation efforts on a small subset of species at the network core (19; 20;  
187 21; 22; 23; 36; 37) may be difficult to achieve, given that virtually no species plays that role  
188 consistently over time in the long run. Our findings do indicate that a small subset of species  
189 is likely to be found playing a key role as part of the network core in many seasons and years,  
190 which brings them close to the notion of “core” species and would make them adequate tar-  
191 gets for conservation efforts. Plant species in this group include *Condalia microphilla*, *Larrea*  
192 *divaricata*, *Prosopis flexuosa* and *Zuccagnia punctata* whereas flower visitors in this group in-  
193 clude *Apis mellifera*, *Augchloropsis* sp., *Bombus opipheax*, *Centris brethesi*, *Copestylum aricia*,  
194 and *Xylocopa atamisquensis*.

195 Yet, a majority of core species was core in a substantially smaller fraction of subseasons  
196 (see Fig. 4). These species could be viewed as *quasi-core* species, in the sense that they are

197 present in the core only intermittently. Thus, the identification of core species based on one or  
198 a few years of sampling—as done in most studies published so far—could be misleading, and a  
199 single static characterization of an ecological network will fail to reveal its true core–periphery  
200 structure. In this sense, the idea of species “coreness” (35; 38) is not just a black-or-white  
201 property determined only by the position of a species in a static or aggregated network,  
202 but a relative concept determined by the temporal consistency of the position occupied by  
203 a species. Therefore, identifying core species as candidates for management actions requires  
204 allocating a greater sampling effort into capturing the temporal dynamics of ecosystems, even  
205 if this practice implies relaxing efforts to capture some details of community structure and  
206 the detection of very rare species, which are unlikely to be part of the network core and to  
207 contribute significantly to community robustness to environmental perturbations.

208 To conclude, we believe these results illuminate our understanding of the dynamics of  
209 ecological networks, indicating the persistence of a core–periphery structure in spite of sub-  
210 stantial changes in species richness, composition, interactions and structural position in the  
211 network. Yet, we believe we have only scratched the surface of the temporal dynamics of  
212 ecological networks. One possible avenue for future research would be to apply the methods  
213 used here to analyze other datasets, to assess the generality of our findings.

## 214 **Acknowledgements**

215 VM thanks Sébastien Ibanez and Hugo Fort for their useful comments. Funding was provided  
216 by the French National Center for Scientific Research (CNRS) and the French National Re-  
217 search Agency (ANR) grant ANR-18-CE02-0010-01 EcoNet (VM), CONICYT/FONDECYT  
218 grants 1150348 and 1190173 (RRJ), a FONCYT grant PICT-2014-3168 (DPV), the People  
219 Programme (Marie Curie Actions) of the European Union’s Seventh Framework Programme  
220 (FP7/2007-2013, REA grant agreement 609305) (DPV), and a Bessel Research Award from  
221 Alexander von Humboldt Foundation (DPV).

## 222 References

- 223 [1] Faegri, F. & van der Pijl, L., 1979 *The Principles of Pollination Biology*. Oxford, U.K.:  
224 Pergamon.
- 225 [2] Boucher, D. H., James, S. & Keeler, K. H., 1982 The ecology of mutualism. *Annual*  
226 *Review of Ecology and Systematics* **13**, 315–347.
- 227 [3] Waser, N. M., Chittka, L., Price, M. V., Williams, N. M. & Ollerton, J., 1996 General-  
228 ization in pollination systems, and why it matters. *Ecology* **77**, 1043–1060.
- 229 [4] Jordano, P., 1987 Patterns of mutualistic interactions in pollination and seed dispersal:  
230 connectance, dependence asymmetries, and coevolution. *American Naturalist* **129**, 657–  
231 677.
- 232 [5] Memmott, J., 1999 The structure of a plant-pollinator food web. *Ecology Letters* **2**,  
233 276–280.
- 234 [6] Bascompte, J. & Jordano, P., 2014 *Mutualistic networks*. Princeton University Press.
- 235 [7] Bascompte, J., Jordano, P., Melián, C. J. & Olesen, J. M., 2003 The nested assembly  
236 of plant-animal mutualistic networks. *Proceedings of the National Academy of Sciences*  
237 *USA* **100**, 9383–9387.
- 238 [8] Olesen, J. M., Bascompte, J., Dupont, Y. L. & Jordano, P., 2007 The modularity of  
239 pollination networks. *Proceedings of the National Academy of Sciences* **104**, 19891–  
240 19896. (doi:10.1073/pnas.0706375104).
- 241 [9] Vázquez, D. P. & Aizen, M. A., 2004 Asymmetric specialization: a pervasive feature of  
242 plant–pollinator interactions. *Ecology* **85**, 1251–1257.
- 243 [10] Bascompte, J., Jordano, P. & Olesen, J. M., 2006 Asymmetric coevolutionary networks  
244 facilitate biodiversity maintenance. *Science* **312**, 431–433.

- 245 [11] Thébault, E. & Fontaine, C., 2010 Stability of ecological communities and the architec-  
246 ture of mutualistic and trophic networks. *Science* **329**, 853–856.
- 247 [12] Rohr, R. P., Saavedra, S. & Bascompte, J., 2014 On the structural stability of mutualistic  
248 systems. *Science* **345**. (doi:10.1126/science.1253497).
- 249 [13] Lomáscolo, S. B., Giannini, N., Chacoff, N. P., Castro-Urgal, R. & Vázquez, D. P.,  
250 2019 Inferring coevolution in a plant–pollinator network. *Oikos* **00**, 000–000. (doi:  
251 10.1111/oik.05960).
- 252 [14] Petanidou, T., Kallimanis, A. S., Tzanopoulos, J., Sgardelis, S. P. & Pantis, J. D., 2008  
253 Long-term observation of a pollination network: fluctuation in species and interactions,  
254 relative invariance of network structure and implications for estimates of specialization.  
255 *Ecology Letters* **11**, 564–575. (doi:10.1111/j.1461-0248.2008.01170.x).
- 256 [15] CaraDonna, P. J., Petry, W. K., Brennan, R. M., Cunningham, J. L., Bronstein, J. L.,  
257 Waser, N. M. & Sanders, N. J., 2017 Interaction rewiring and the rapid turnover of  
258 plant–pollinator networks. *Ecology Letters* pp. n/a–n/a. ISSN 1461-0248. (doi:10.1111/  
259 ele.12740).
- 260 [16] Chacoff, N. P., Resasco, J. & Vázquez, D. P., 2018 Interaction frequency, network posi-  
261 tion, and the temporal persistence of interactions in a plant–pollinator network. *Ecology*  
262 **99**, 21–28. ISSN 1939-9170. (doi:10.1002/ecy.2063).
- 263 [17] Nielsen, A. & Bascompte, J., 2007 Ecological networks, nestedness and sampling effort.  
264 *Journal of Ecology* **95**, 1134–1141. (doi:10.1111/j.1365-2745.2007.01271.x).
- 265 [18] Fang, Q. & Huang, S., 2016 Plant-pollinator interactions in a biodiverse meadow are  
266 rather stable and tight for 3 consecutive years. *Integrative Zoology* **11**, 199–206.
- 267 [19] Fleishman, E., Betrus, C. J., Blair, R. B., Mac Nally, R. & Murphy, D. D., 2002 Nest-  
268 edness analysis and conservation planning: the importance of place, environment, and  
269 life history across taxonomic groups. *Oecologia* **133**, 78–89.

- 270 [20] Fleishman, E., Donnelly, R., Fay, J. P. & Reeves, R., 2007 Applications of nestedness  
271 analyses to biodiversity conservation in developing landscapes. *Landscape and Urban*  
272 *Planning* **81**, 271–281.
- 273 [21] Hegland, S. J., Dunne, J., Nielsen, A. & Memmott, J., 2010 How to monitor ecologi-  
274 cal communities cost-efficiently: The example of plant-pollinator networks. *Biological*  
275 *Conservation* **143**, 2092–2101. (doi:DOI:10.1016/j.biocon.2010.05.018).
- 276 [22] Chacoff, N. P., Vázquez, D. P., Lomáscolo, S. B., Stevani, E. L., Dorado, J. & Padrón,  
277 B., 2012 Evaluating sampling completeness in a desert plant–pollinator network. *Journal*  
278 *of Animal Ecology* **81**, 190–200.
- 279 [23] García-Algarra, J., Pastor, J. M., Iriando, J. M. & Galeano, J., 2017 Ranking of critical  
280 species to preserve the functionality of mutualistic networks using the  $k$ -core decompo-  
281 sition. *PeerJ* p. e3321. (doi:10.7717/peerj.3321).
- 282 [24] Rohe, K., Qin, T. & Yu, B., 2016 Co-clustering directed graphs to discover asymmetries  
283 and directional communities. *Proceedings of the National Academy of Sciences* **113**,  
284 12679–12684.
- 285 [25] Matias, C. & Miele, V., 2017 Statistical clustering of temporal networks through a  
286 dynamic stochastic block model. *Journal of the Royal Statistical Society: Series B*  
287 *(Statistical Methodology)* **79**, 1119–1141.
- 288 [26] Michalska-Smith, M. J., Sander, E. L., Pascual, M. & Allesina, S., 2018 Understanding  
289 the role of parasites in food webs using the group model. *J Anim Ecol* **87**, 790–800.
- 290 [27] Allesina, S. & Pascual, M., 2009 Food web models: a plea for groups. *Ecol. Lett.* **12**,  
291 652–662.
- 292 [28] Leger, J.-B., Daudin, J.-J. & Vacher, C., 2015 Clustering methods differ in their ability  
293 to detect patterns in ecological networks. *Methods in Ecology and Evolution* **6**, 474–481.

- 294 [29] Kéfi, S., Miele, V., Wieters, E. A., Navarrete, S. A. & Berlow, E. L., 2016 How structured  
295 is the entangled bank? The surprisingly simple organization of multiplex ecological  
296 networks leads to increased persistence and resilience. *PLoS Biology* **14**. (doi:doi:10.  
297 1371/journal.pbio.1002527).
- 298 [30] Ohlmann, M., Miele, V., Dray, S., Chalmandrier, L., O'Connor, L. & Thuiller, W.,  
299 2019 Diversity indices for ecological networks: a unifying framework using hill numbers.  
300 *Ecology Letters* .
- 301 [31] Holland, P. W., Laskey, K. B. & Leinhardt, S., 1983 Stochastic blockmodels: First steps.  
302 *Social networks* **5**, 109–137.
- 303 [32] Newman, M. E. J. & Leicht, E. A., 2007 Mixture models and exploratory analysis  
304 in networks. *Proceedings of the National Academy of Sciences* **104**, 9564–9569. (doi:  
305 doi:10.1073/pnas.0610537104).
- 306 [33] Daudin, J. J., Picard, F. & Robin, S., 2008 A mixture model for random graphs. *Statis-*  
307 *tics and Computing* **18**, 173–183. (doi:doi:10.1007/s11222-007-9046-7).
- 308 [34] Betzel, R. F., Medaglia, J. D. & Bassett, D. S., 2018 Diversity of meso-scale architecture  
309 in human and non-human connectomes. *Nature Communications* **9**, 346.
- 310 [35] Lee, S. H., 2016 Network nestedness as generalized core-periphery structures. *Phys. Rev.*  
311 *E* **93**, 022306. (doi:10.1103/PhysRevE.93.022306).
- 312 [36] Cagua, E. F., Wootton, K. L. & Stouffer, D. B., 2019 Keystoneness, centrality, and the  
313 structural controllability of ecological networks. *Journal of Ecology* ISSN 0022-0477.  
314 (doi:10.1111/1365-2745.13147).
- 315 [37] Maia, K. P., Vaughan, I. P. & Memmott, J., 2019 Plant species roles in pollination  
316 networks: an experimental approach. *Oikos* ISSN 0030-1299. (doi:10.1111/oik.06183).

- 317 [38] Borgatti, S. P. & Everett, M. G., 2000 Models of core/periphery structures. *Social*  
318 *Networks* **21**, 375–395. TY - JOUR.

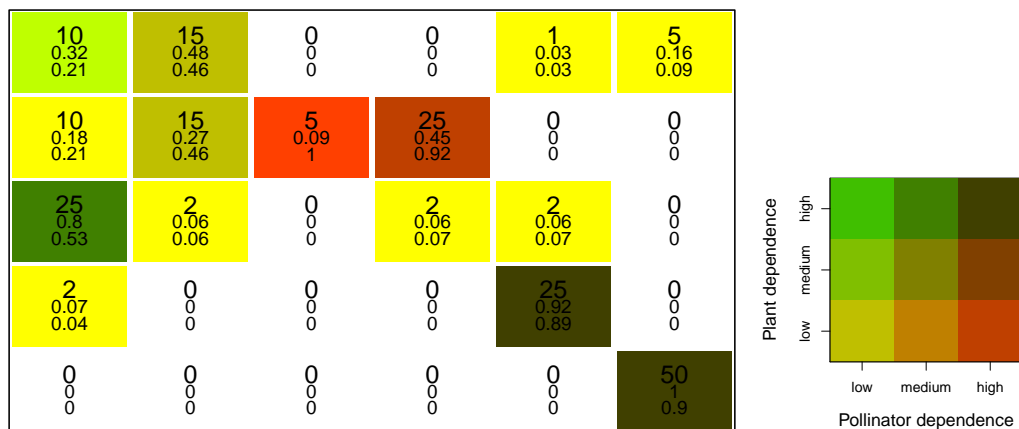

Figure 1: Representation of a dependence network between 5 plant species (rows) and 6 pollinator species (columns). Each cell is colored according to the legend and filled with the number of visits (top value in larger font), the plant and pollinator dependence values  $D_{ij}$  (middle) and  $D_{ji}$  (bottom). The legend shows the color code accounting for the two dependence values for any species pair  $(i, j)$  (darker green represents higher the plant dependence; stronger red represents higher the pollinator dependence). This example shows the advantage of studying dependence values instead of raw data. The number of visits in cells (3,1), (2,4) and (4,5) are all equal to 25. Meanwhile, these number of visits do not characterize the same kind of interaction, as shown by the dependence values. Indeed, plant 3 is highly dependent on pollinator 1 (the reverse is not true), pollinator 4 is highly dependent on plant 2 (the reverse is not true) whereas plant 4 and pollinator 5 are mutually dependent and have a quasi-exclusive relationship. Lastly, the number of visits in cell (5,6) is twice the number in cell (4,5) but the dependence values are comparable (dependence is scale invariant).



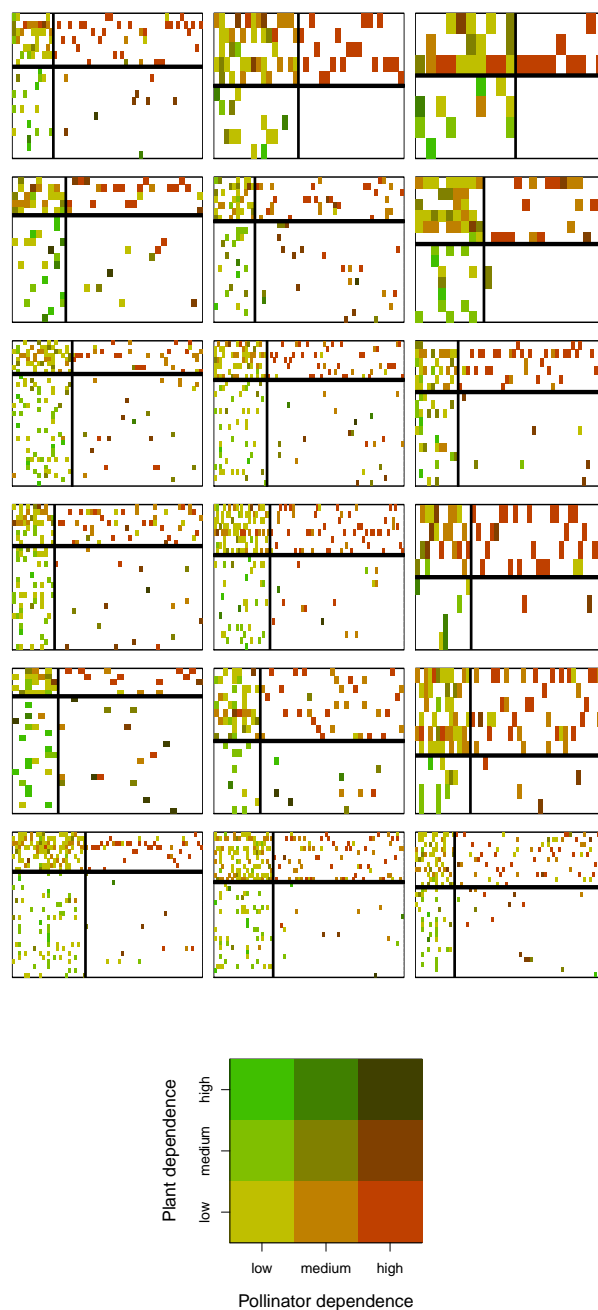

Figure 2: Temporal dynamics of Villavicencio plant-pollinator network. For each matrix, cells represent the plant and pollinator dependence values between a plant (rows) and pollinator (columns) species, with a color computed as a mixture of the two dependence values according to the legend. Rows and columns were reorganized according to the dynSBM group membership: dark lines separating each matrix delineate the group boundaries (core/peripheral group of plants above/below the horizontal line; core/peripheral group of pollinators on the left/right of the vertical line).

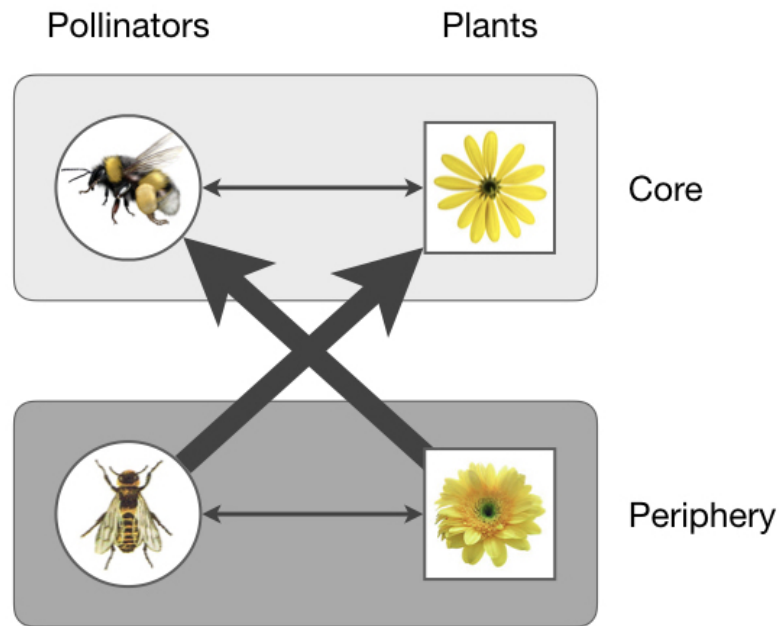

Figure 3: Graphical representation of the core–periphery structure found in our dynamic plant–pollinator network. Arrows depict dependences of one species (arrow origin) on another (arrow tip). Arrow widths are proportional to typical dependence values between groups. Pollinators/plants of the network periphery are strongly dependent on plants/pollinators that belong to the network core.

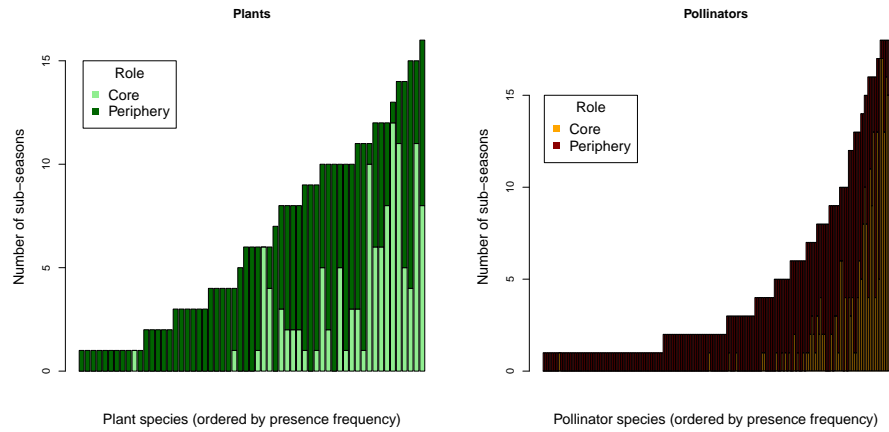

Figure 4: Temporal shifts in species structural positions. Each stacked bar (one by species) represents the number of subseasons any species was found in the core (light color) or in the periphery (dark color). Bars were ranked according to the number of subseasons any species was observed and present in the network. For plants (left) and pollinators (right).

# Core–periphery dynamics in a plant–pollinator network

Vincent Miele<sup>1</sup>, Rodrigo Ramos-Jiliberto<sup>2</sup> and Diego P. Vázquez<sup>3,4,5</sup>

<sup>1</sup> Université de Lyon, F-69000 Lyon; Université Lyon 1; CNRS, UMR5558, Laboratoire de Biométrie et Biologie Évolutive, F-69622 Villeurbanne, France. E-mail: vincent.miele@univ-lyon1.fr.

<sup>2</sup> GEMA Center for Genomics, Ecology & Environment, Faculty of Sciences, Universidad Mayor, Camino La Pirámide 5750, Huechuraba, Santiago, Chile. E-mail: rodrigo.ramos@umayor.cl.

<sup>3</sup> Argentine Institute for Dryland Research, CONICET, Mendoza, Argentina

<sup>4</sup> Freiburg Institute for Advanced Studies, University of Freiburg, Freiburg im Breisgau, Germany

<sup>5</sup> Faculty of Exact and Natural Sciences, National University of Cuyo, Mendoza, Argentina. E-mail: dvazquez@mendoza-conicet.gob.ar.

\* Corresponding author: Diego P. Vázquez, Argentine Institute for Dryland Research, CCT CONICET Mendoza, Av. Ruiz Leal s/n, 5500 Mendoza, Argentina. E-mail: dvazquez@mendoza-conicet.gob.ar.

## Details of the dynamic stochastic block model analysis

Under the dynamic stochastic block model (dynSBM) approach (which is presented in details in (1) and (2)), structural position assignment is defined not only by a SBM (one per time step) but also by a Markov chain that models the switches at each time interval. Here, we rely

on a modified version of this approach for bipartite networks where each SBM has the same parameters values at each time step. Each SBM is parametrized by an appropriate statistical distribution. Here we used dynSBM with multinomial distributions to model edge weights (dependence values) that were categorized into three levels corresponding to *low*, *medium* and *high* dependence (lower than 0.2, in between and larger than 0.8, respectively). The number of groups is constant and selected with an appropriate heuristics (Supplementary Figure S1). Structural position assignment (i.e., SBM group membership) can change over time, but there is no constraint for the found structure to be present at each time step (see Supplementary Figure S3). This approach can be reproduced with the R package `dynsbm` available on CRAN at <https://cran.r-project.org/web/packages/dynsbm/>.

## Choice of the number of groups in dynSBM

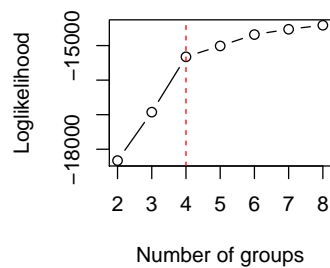

Figure S1: Selecting a dynSBM with 4 groups. The slope of the log-likelihood highly decreases for  $\geq 4$  groups (“elbow” method, see 2).

## Inter/intra-group dependence values

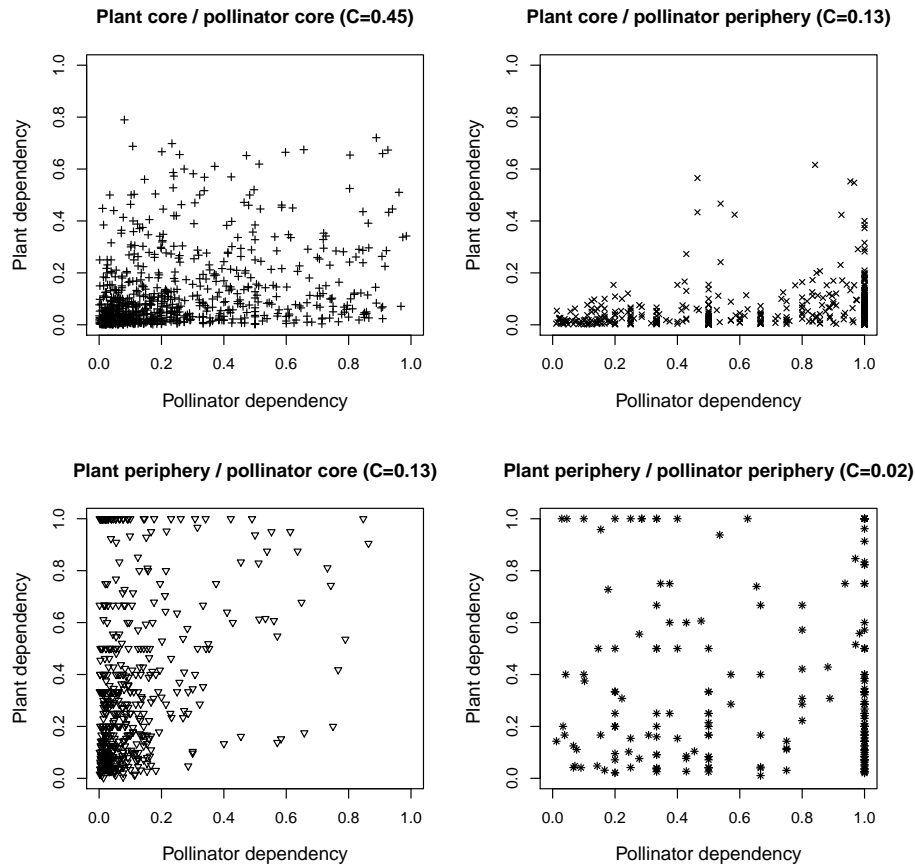

Figure S2: Plant dependence versus pollinator dependence for all the interactions observed in the 18 dependence networks, represented for the four inter-group categories: between plant and pollinator species from the core (top left), from the plant core and the pollinator periphery (top right), from the plant periphery and the pollinator core (bottom left) and from the periphery only (bottom right). The connectance ( $C$ ) is indicative and corresponds to the fraction of realized interactions.

## No persistence of core/periphery structure in a randomly perturbed network

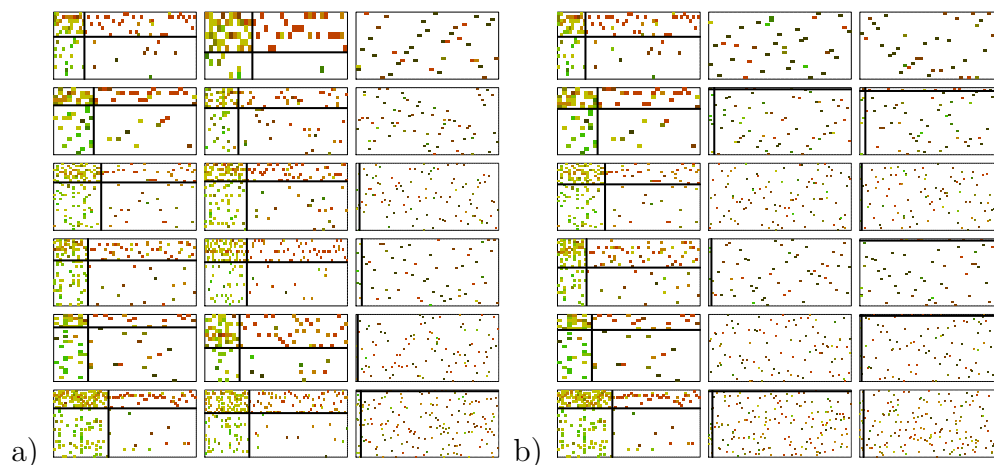

Figure S3: Core/periphery structure does not persist when networks are randomly perturbed. Same as Figure ?? but networks were randomized a) in each third subseason or b) second and third subseasons. The dynSBM model was re-estimated with a fixed number of 4 groups.



## Variation of the number of species

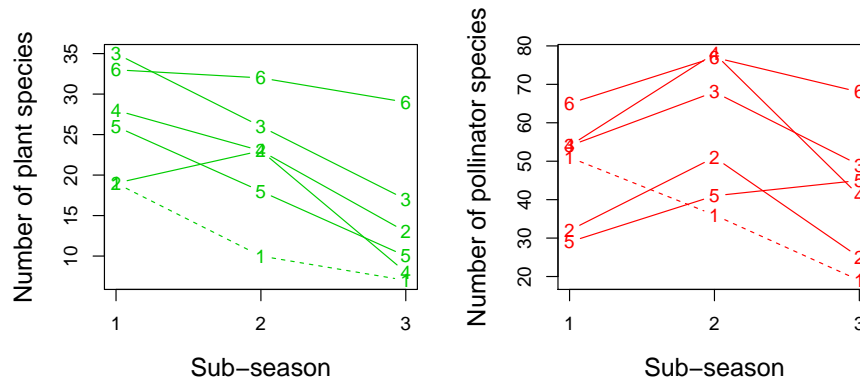

Figure S4: Number of species for the three successive subseasons for each year. The six lines are numbered according to the index of the year of study (from 1 to 6 for 2006 to 2011). The line 1 (2006) is in dashed line to highlight the much lower overall number of species in this particular year. For plants (left) and pollinators (right).

## Temporal variation of species activity

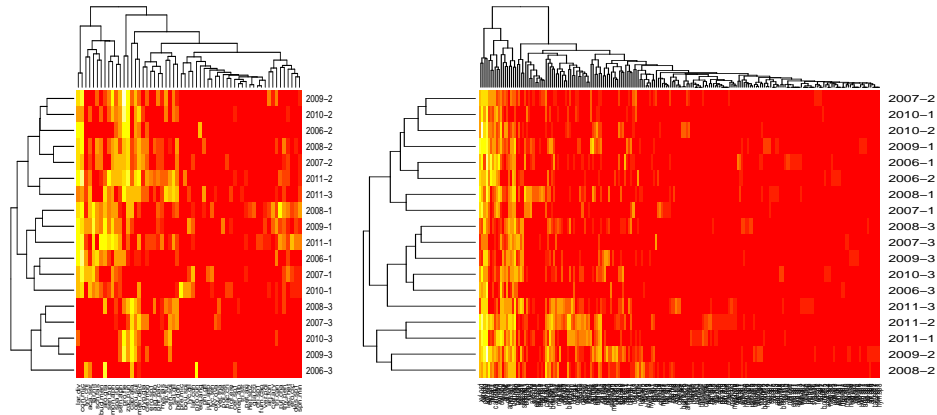

Figure S5: Species activity classification. The activity, measured by the total number of floral visits received by a plant or performed by a pollinator, is represented in a heatmap (red to yellow color scale for null to maximum activity; log-scale). Subseasons in rows (denoted by the year and the index of the subseason in the year) and species in columns are reordered with a hierarchical clustering based on the similarity in activity (log scale, euclidian distance). For plants (left) and pollinators (right). First/second/third subseasons of different years are clearly packed in clumps (*i.e.* subparts of the dendrogram) showing similar plant activity, whereas this pattern is less clear in the case of pollinators (still, the third subseasons are packed together).

## Species turnover and role switch over time

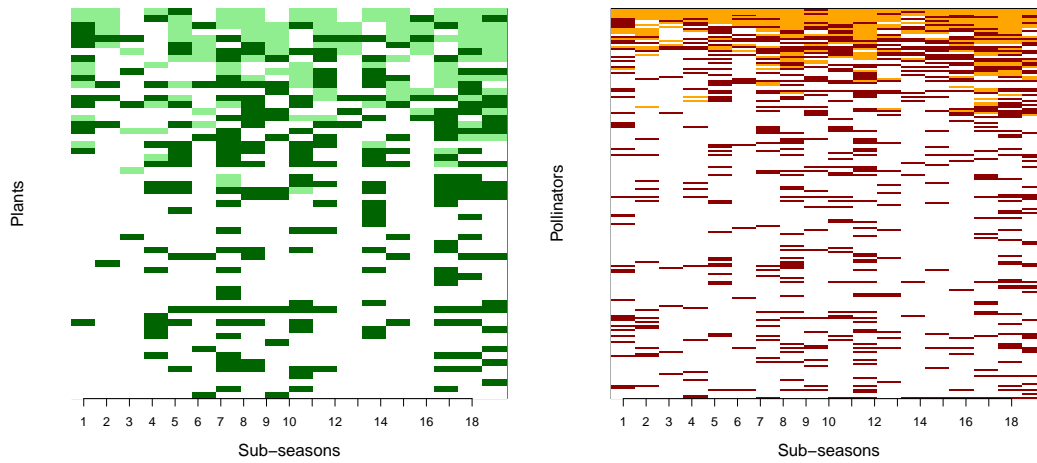

Figure S6: Species turnover and role switch over time. Matrix representation shows when any species (rows) is in the core (light color), in periphery (dark color) or absent (white) over time (columns; 18 subseasons). For plants (left) and pollinators (right).

## Plant role is correlated with abundance

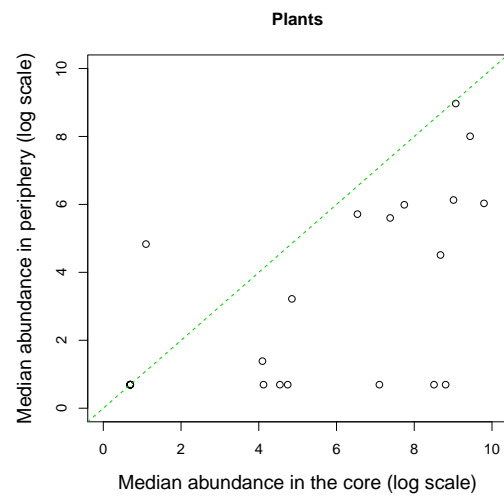

Figure S7: Plant role is correlated with abundance. Each marker shows the median abundance (number of flowers) of a given species when it is in the core compared to its median abundance when it is peripheral. Dashed lines represent the line with slope 1.

## References

- [1] Matias, C. & Miele, V., 2017 Statistical clustering of temporal networks through a dynamic stochastic block model. *Journal of the Royal Statistical Society: Series B (Statistical Methodology)* **79**, 1119–1141.
- [2] Miele, V. & Matias, C., 2017 Revealing the hidden structure of dynamic ecological networks. *Royal Society Open Science* **4**, 170251.
